# Supplementary material
Source: PubMed Central journal article supplement (PMC117539)

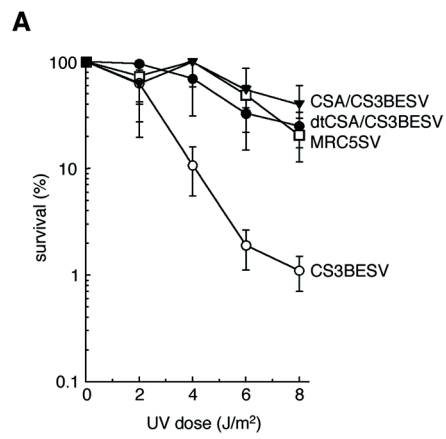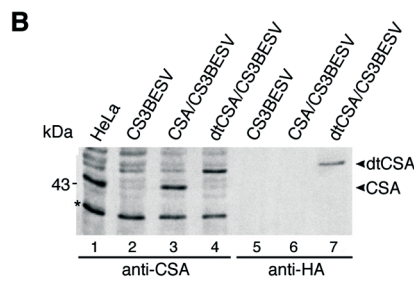

Supplement: pnas_99_1_201__3.pdf [file pnas_99_1_201__3.pdf]
